1 **TAL effectors with avirulence activity in African strains of *Xanthomonas oryzae* pv.**  
2 ***oryzae***

3

4 Marlène Lachaux<sup>1</sup>, Emilie Thomas<sup>1</sup>, Adam J. Bogdanove<sup>2</sup>, Boris Szurek<sup>1\*</sup> and Mathilde  
5 Hutin<sup>1\*</sup>

6

7 \*Correspondence: [boris.szurek@ird.fr](mailto:boris.szurek@ird.fr); [mathilde.hutin@ird.fr](mailto:mathilde.hutin@ird.fr)

8 <sup>1</sup>PHIM, IRD, CIRAD, INRAe, Institut Agro, Univ. Montpellier, Montpellier, France

9 <sup>2</sup>Plant Pathology and Plant Microbe Biology Section, School of Integrative Plant Science,  
10 Cornell University, Ithaca, NY, 14853 United States of America

11

12 **Abstract**

13

14 **Background:** *Xanthomonas oryzae* pv. *oryzae* causes bacterial leaf blight, a devastating  
15 disease of rice. Among the type-3 effectors secreted by *Xanthomonas oryzae* pv. *oryzae* to  
16 support pathogen virulence, the Transcription Activator-Like Effector (TALE) family plays a  
17 critical role. Some TALEs are major virulence factors that activate susceptibility (*S*) genes,  
18 overexpression of which contributes to disease development. Host incompatibility can result  
19 from TALE-induced expression of so-called executor (*E*) genes leading to a strong and rapid  
20 resistance response that blocks disease development. In that context, the TALE functions as an  
21 avirulence (*Avr*) factor. To date no such avirulence factors have been identified in African  
22 strains of *Xanthomonas oryzae* pv. *oryzae*.

23 **Results:** With respect to the importance of TALEs in the Rice-*Xoo* pathosystem, we aimed at  
24 identifying those that may act as *Avr* factor within African *Xoo*. We screened 86 rice

25 accessions, and identified 12 that were resistant to two African strains while being susceptible  
26 to a well-studied Asian strain. In a gain of function approach based on the introduction of each  
27 of the nine *tal* genes of the avirulent African strain MA11 into the virulent Asian strain  
28 PXO99<sup>A</sup>, four were found to trigger resistance on specific rice accessions. Loss-of-function  
29 mutational analysis further demonstrated the *avr* activity of two of them, *talD* and *tall*, on the  
30 rice varieties IR64 and CT13432 respectively. Further analysis of Tall demonstrated the  
31 requirement of its activation domain for triggering resistance in CT13432. Resistance in 9 of  
32 the 12 rice accessions that were resistant against African *Xoo* specifically, including CT13432,  
33 could be suppressed or largely suppressed by trans-expression of the truncTALE *tal2h*,  
34 similarly to resistance conferred by the *Xal* gene which recognizes TALEs generally  
35 independently of their activation domain.

36 **Conclusion:** We identified and characterized TalD and Tall as two African *Xoo* TALEs with  
37 avirulence activity on IR64 and CT13432 respectively. Resistance of CT13432 against African  
38 *Xoo* results from the combination of two mechanisms, one relying on the Tall-mediated  
39 induction of an unknown executor gene and the other on an *Xal*-like gene or allele.

40

41 **Keywords:**

42 Rice, bacterial leaf blight, truncTALE/iTALE, germplasm, executor gene, *Xal*-like resistance

43

## 44 **Introduction**

45 Cultivated plants constantly face multiple abiotic and biotic stresses, the latter of which are  
46 estimated to cause from 17 to 30% of global yield losses on five of the most important crops  
47 including rice (Savary et al. 2019). Rice (*Oryza sativa* L.) is one of the most widely cultivated  
48 crops around the world and a staple food for much of the developing world (Ainsworth 2008).  
49 A major threat to rice production in Asia and Africa is bacterial leaf blight (BLB) caused by  
50 the bacterial phytopathogen *Xanthomonas oryzae* pv. *oryzae* (*Xoo*). BLB may indeed cause up  
51 to 50% of yield loss depending on rice variety, growth stage of infection, geographic location  
52 and environmental conditions (Liu et al. 2014). *Xoo* enters leaves through hydathodes or  
53 wounds. Bacteria then multiply in the intercellular spaces of the underlying epitheme prior to  
54 reaching the xylem vessels and propagating into the plant. BLB symptoms are water-soaked  
55 lesions that spread following the bacteria's progression down the leaf and become chlorotic  
56 and then necrotic (Niño-Liu et al. 2006).

57

58 As do many pathogenic gram-negative bacteria, *Xoo* uses a type-3 secretion system (T3SS) to  
59 secrete into the host cytoplasm a cocktail of type-3 effectors (T3E) that can be classified as  
60 transcription activator-like (TAL) effectors and non-TAL effectors. While the latter include a  
61 diverse array of effector families with various molecular activities, members of the TAL  
62 effector (TALE) family function as eukaryotic transcription factors that bind in a sequence-  
63 specific manner to the promoters of target genes in the host cells. Repeat-variable diresidues  
64 (RVDs) located at positions 12<sup>th</sup> and 13<sup>th</sup> of each of several contiguous repeats in a central  
65 domain of TALEs determine the DNA sequence binding specificity of the protein, one repeat  
66 to one nucleotide (Boch et al. 2009; Moscou and Bogdanove 2009). The target sequence,  
67 unique to each TALE, is called the effector binding element (EBE). Some *Xoo* TALEs are

68 major virulence factors, targeting susceptibility (*S*) genes. TALE driven upregulation of these  
69 genes contributes to disease development. *S* genes characterized to date for BLB mainly encode  
70 clade-3 *SWEET* sugar uniporters that may increase the abundance of apoplastic sugar to the  
71 benefit of the pathogen, or transcription factors that regulate so far unknown secondary targets  
72 promoting host susceptibility (Garcia-Ruiz et al. 2021).

73

74 Forty-six genes, several dominant and some recessive, individually govern rice resistance  
75 against *Xoo*. Twelve have been cloned and nine are TALE-dependent, reflecting the crucial  
76 role of TALEs in the interaction (Jiang et al. 2020). Recessive resistance often involves  
77 mutations within the EBE of an *S* gene to prevent the TALE-DNA interaction and consequent  
78 *S* gene induction. This is well illustrated by the non-TALE-inducible *xa13*, *xa25* and *xa41* loss-  
79 of-susceptibility alleles of the major *S* genes *OsSWEET11*, *OsSWEET13*, and *OsSWEET14*,  
80 respectively (Chu et al. 2006; Liu et al. 2011; Hutin et al. 2015). Dominant resistance is often  
81 triggered by TALE-mediated induction of so-called executor (*E*) genes, expression of which  
82 leads to rapid plant cell death that blocks disease development (Boch et al. 2014). Four *E* genes,  
83 namely *Xa7*, *Xa10*, *Xa23*, *Xa27*, and their respective matching *tal* genes, *avrXa7*, *avrXa10*,  
84 *avrXa23*, *avrXa27*, have been cloned and characterized (Hopkins et al. 1992; Gu et al. 2005;  
85 Tian et al. 2014; Wang et al. 2014, 2015; Chen et al. 2021; Luo et al. 2021). These *tal* genes  
86 are only present in Asian strains of *Xoo* and no *E* genes induced by African *Xoo* TALEs have  
87 been identified to date. *E* genes so far code for small proteins with transmembrane domains,  
88 and the molecular mechanisms underlying their function are still unclear far from being  
89 understood (Zhang et al. 2015; Chen et al. 2021). Another type of dominant resistance is  
90 conferred by receptor-like kinases (RLK), such as *Xa3/Xa26* (Sun et al. 2004; Xiang et al.

91 2006) and *Xa21* (Song et al. 1995), but also *Xa4* which encodes a cell wall-associated kinase  
92 (Hu et al. 2017). Finally, the last category are genes encoding nucleotide-binding domain  
93 leucine-rich repeat containing receptors (NLR) such as *Xa1* and its apparent alleles *Xo1*, *Xa2*,  
94 *Xa14*, *Xa31(t)* and *Xa45(t)* (Ji et al. 2020; Read et al. 2020; Zhang et al. 2020). We consider  
95 the latter genes “apparent” alleles because *Xo1* resides in a cluster of NLR genes, the number  
96 of which varies among rice genotypes, making orthology uncertain. *Xa1* and *Xo1* were shown  
97 to mediate resistance in response to TALEs generally, independently of their specific RVD  
98 sequence, and with no requirement for the transcriptional activation domain (Ji et al. 2016;  
99 Triplett et al. 2016; Read et al. 2020). A variant class of TALEs called interfering (iTALE) or  
100 truncated (truncTALE) TALEs suppress *Xa1/Xo1*-mediated resistance, and the truncTALE  
101 Tal2h has been demonstrated to interact with *Xo1* (Ji et al. 2016; Read et al. 2016, 2020).  
102 Whether this interaction is direct, and whether *Xo1* interacts with TALEs to mediate resistance  
103 remains to be elucidated. The analysis of functional apparent alleles of *Xa1* and *Xo1* highlight  
104 the systematic absence of an intervening motif present in non-functional alleles, and differences  
105 in the number (4 to 7) of central tandem repeats that might explain differences in their activity  
106 (Zhang et al. 2020). Interestingly, most Asian strains of *Xoo* harbor iTALEs/truncTALEs while  
107 African strains do not, explaining why African strains are widely controlled by *Xa1*, *Xo1* or  
108 functional homologs (Ji et al. 2016; Read et al. 2016, 2020).

109

110 Previous studies demonstrated that African *Xoo* are genetically distant from Asian *Xoo* and  
111 closer to *Xanthomonas oryzae* pv. *oryzicola* (*Xoc*) (Poulin et al. 2015), which causes bacterial  
112 leaf streak. A characteristic feature of African *Xoo* is their small TALome (set of *tal* genes)  
113 consisting of 8-9 genes, relative to Asian *Xoo* which carry up to 19 *tal* genes. Moreover, no

114 TALE is conserved between Asian and African strains (Lang et al. 2019). Comparative analysis  
115 of the TALome of several African strains revealed six groups of polymorphic TALEs based on  
116 their RVD sequences, including TalA, TalB, TalD, TalF, TalH, and TalI (Doucouré et al. 2018;  
117 Tran et al. 2018). African *Xoo* are also distinguished by a reduced number of races as compared  
118 to Asian *Xoo* (Gonzalez et al. 2007; Tekete et al. 2020). Race profiling on near isogenic lines  
119 (NILs) reported the potential of *Xa4*, *xa5* and *Xa7* or co-segregating genes to control a few  
120 African *Xoo* from Burkina Faso, Niger, and Cameroon (Gonzalez et al. 2007), but the resistance  
121 spectrum of these genes has yet to be evaluated on a larger set of strains. Furthermore, *Xa1*  
122 comes up as one of the most promising *R* genes in terms of resistance spectrum for the Malian  
123 *Xoo* population (Tekete et al. 2020). Other studies to identify resistance against African *Xoo*  
124 evaluated 107 accessions of *O. glaberrima*, the cultivated rice species domesticated in Africa,  
125 as well as improved varieties including NERICA (NEw RICE for Africa) (Djedatin et al. 2011;  
126 Wonni et al. 2016). NERICA varieties are often the result of the inter-specific crosses between  
127 *O. glaberrima*, which represents important germplasm for resistance to local biotic and abiotic  
128 stresses, and high-yielding Asian *O. sativa*. These studies identified 25 accessions of *O.*  
129 *glaberrima* that are resistant to one or more African strains of *Xoo*, and five Burkinabe elite  
130 rice varieties (Djedatin et al. 2011; Wonni et al. 2016). Genes or quantitative trait loci  
131 accounting for resistance in these varieties remain to be explored.

132

133 In this study, toward providing breeders with new resistance genes against African *Xoo*, we  
134 screened 86 rice accessions including 16 accessions tested previously (Djedatin et al. 2011;  
135 Wonni et al. 2016) for resistance to two reference African *Xoo* strains MAI1 and BAI3,  
136 respectively originating from Mali and Burkina Faso. We included the Asian strain PXO99<sup>A</sup>

137 for comparison. For select accessions, we probed with individual TALEs from the African  
138 strains expressed in PXO99<sup>A</sup> to identify potential *E* or other TALE-dependent resistance genes.  
139 We report on the identification of 12 accessions showing resistance to both African strains,  
140 nine of which involving an *Xa1*-like immunity, and unveil two TALEs with avirulence activity  
141 in African *Xoo*. Interestingly, our approach unmasked the occurrence of two overlapping  
142 TALE-mediated sources of resistance in the rice variety CT13432, one involving *Xa1*-like  
143 activity and the other a so far unknown Tall-dependent *E* gene.  
144

145 **Results**

146 **Germplasm screening for TALE-dependent resistance against African *Xoo* uncovers**  
147 **three resistant rice varieties**

148 To search for African *Xoo tales* with *avr* activity, we established a gain-of-function approach  
149 consisting in the trans-expression of these *tal* genes in a virulent recipient strain of *Xoo*. We  
150 first screened a germplasm of 86 accessions of rice and selected those that were susceptible to  
151 the Asian *Xoo* strain PXO99<sup>A</sup> and resistant to the reference African *Xoo* strains MAI1 and  
152 BAI3. Twelve accessions exhibited that phenotype, including two *O. glaberrima*, three *O.*  
153 *sativa* (two *indica* and one *japonica*), and seven elite varieties that are popular in West-Africa  
154 (Table S1). To investigate whether the resistance of these 12 accessions to African *Xoo* is  
155 triggered by TALEs, each of the nine *tal* genes of the *Xoo* strain MAI1 was introduced into the  
156 virulent strain PXO99<sup>A</sup>. Each PXO99<sup>A</sup> transformant carrying an *Xoo* MAI1 *tal* gene was  
157 inoculated to the 12 accessions and to the rice variety Azucena, which was used as susceptible  
158 check. No significant difference in lesion lengths was observed upon leaf-clip inoculation of  
159 Azucena leaves with the different transformants 15 days after inoculation. In contrast, the  
160 varieties CT13432 and FKR47N exhibited resistance when inoculated with PXO99<sup>A</sup>  
161 transformants carrying *talI* and *talF*, respectively. In addition, PXO99<sup>A</sup> strains with *talD* or  
162 *talH* both elicited resistance when inoculated to the *O. sativa* ssp. *indica* variety IR64. Overall,  
163 four TALEs with avirulence activity and three rice accessions with TAL-dependent resistance  
164 were pinpointed through this gain-of-function strategy (Table 1).

165

166 ***tal* genes mutagenesis confirms *talD* avirulence activity in IR64**

167 To confirm that *talD*, *talH*, *talI* and *talF* act as avirulence genes in strain MAI1, we attempted  
168 to generate a library of MAI1 *tal* gene mutants by transformation of the suicide plasmid pSM7



169 as reported previously (Cernadas et al. 2014; Tran et al. 2018). Because MAI1 turned out to be  
170 poorly amenable to genetic transformation, we focused on the *Xoo* strain BAI3, which has a  
171 similar TALome (Tran et al. 2018). We obtained at least one mutant strain with a single  
172 insertion for each *tal* gene, except for *talH* (Fig. S1). Alongside wild-type (WT) BAI3, mutant  
173 strains BAI3 $\Delta$ *talI*, BAI3 $\Delta$ *talF* and BAI3 $\Delta$ *talD* were inoculated to CT13432, FKR47N and  
174 IR64, respectively, and to the Azucena susceptible control. Both leaf-clip inoculation and leaf-  
175 infiltration of the three BAI3 $\Delta$ *tal* mutants produced WT-like symptoms on Azucena, indicating  
176 that virulence of these mutant strains was not affected (Fig. 1; Fig. S2). In contrast, an increase  
177 of lesion lengths was observed upon clip-inoculation of leaves of IR64 with BAI3 $\Delta$ *talD*.  
178 Avirulence was fully restored when a plasmid-borne copy of *talD* was introduced into  
179 BAI3 $\Delta$ *talD* (Fig. 1A), demonstrating the avirulence activity of *talD* in IR64. In contrast, no  
180 loss of resistance was observed upon leaf-infiltration or leaf-clipping of CT13432 and FKR47N  
181 with *talI* or *talF* mutant strains, respectively (Fig. S2, Fig. 1B), leading to the hypothesis that  
182 one or more other *avr* activities, corresponding to one or more other *R* genes, may be masking  
183 those of *talI* and *talF*.

184

### 185 **CT13432 and FKR47N exhibit *XaI*-like resistance**

186 When leaves of CT13432 and FKR47N were infiltrated with BAI3, an early and strong  
187 hypersensitive response (HR) apparent as rapidly developing necrosis could be observed at the  
188 site of inoculation (Fig. S2). *Xal/XoI* being able to confer resistance against African strains of  
189 *Xoo* and *Xoc* specifically (Ji et al. 2016; Triplett et al. 2016), and among the *Xa* genes that  
190 trigger an early and strong HR-like phenotype upon *Xoo* leaf-infiltration, we hypothesized that  
191 some *Xal/XoI*-like mechanism may be at play in the BAI3-CT13432/FKR47N interactions,  
192 redundant to the *talI* and *talF*-specific resistances observed in the gain-of-function

193 experiments. To test this hypothesis we infiltrated the Asian *Xoc* strain BLS256 which carries  
194 the truncTALE *tal2h*, and the derivative mutant strain BLS256 $\Delta$ *tal2h*, into leaves of CT13432,  
195 FKR47N and the susceptible control Azucena (Fig. 2). As expected, all strains promoted water-  
196 soaking symptoms upon infiltration of the susceptible variety Azucena. Typical BLS symptoms  
197 were observed when leaves of CT13432 and FKR47N were infiltrated with *Xoc* strain BLS256,  
198 while a strong resistance phenotype appeared upon infiltration of the truncTALE derivative  
199 mutant BLS256 $\Delta$ *tal2h*, indicating that CT13432 and FKR47N have *Xal/Xol*-like activity. To  
200 further confirm that the resistance of these varieties against *Xoo* strains BAI3 and MAI1 is  
201 conferred in part by an *Xal*-like gene, both strains were transformed with *tal2h* and  
202 pathogenicity assays were performed. As expected, expression of the truncTALE in BAI3 and  
203 MAI1 resulted in a complete loss of HR on CT13432 and FKR47N, which was not the case  
204 when the strains carried an empty vector (Fig. 2). Altogether, our results suggest that African  
205 *Xoo* resistance in CT13432 and FKR47N is mediated by *Xal* or other alleles, in addition to as  
206 yet unidentified resistance genes corresponding to *tall* and *talF*.

207

208 To test whether any of the ten remaining resistant accessions involve similar mechanisms, 3-  
209 week-old plants were inoculated by infiltration and checked for appearance of the HR. As  
210 expected, Carolina Gold Select and IRBB1, carrying respectively *Xol* and *Xal*, displayed  
211 water-soaking lesions when infiltrated with the Asian *Xoc* strain BLS256, and HR when  
212 infiltrated with the African *Xoo* strain BAI3 and the truncTALE derivative mutant  
213 BLS256 $\Delta$ *tal2h* (Fig. S3). Surprisingly, seven out of the eight *O. sativa* spp. accessions also  
214 exhibited a typical *Xal*-like HR to BAI3 and BLS256 $\Delta$ *tal2h* while being susceptible to  
215 BLS256 (and to PXO99<sup>A</sup>, which also carries iTALEs). The two *O. glaberrima* accessions  
216 exhibited no *Xal*-like resistance, developing water-soaking in response to BAI3 or

217 BLS256 $\Delta$ *tal2h* following leaf infiltration (Fig. S3, Table S2). Overall, these observations show  
218 that 9 of the 12 resistant varieties including CT13432 and FKR47N resist African *Xoo* through  
219 *Xal/Xo1*-like mechanisms.

220

### 221 **Presence of *Xal* allelic *R* genes in CT13432 and FKR47N rice varieties**

222 To test the prediction that an *Xal* allele was present in CT13432 and FKR47N, we PCR-  
223 amplified a 202 bp fragment spanning the junction of the first repeat and its up-stream region  
224 (Ji et al. 2020); Table S3), allowing the discrimination of resistant and susceptible alleles  
225 (susceptible alleles yield no product). Analysis was performed also on the *Xal*-carrying near-  
226 isogenic line IRBB1 and the *Xo1*-carrying Carolina Gold Select rice variety as positive  
227 controls, and on Azucena, Nipponbare and IR24 as negative controls. Both CT13432 and  
228 FKR47N yielded a product that co-migrated with those of the positive controls (Fig. 3A). No  
229 amplification was evident from the negative control varieties. We next tried to determine the  
230 number of leucine-rich repeats (LRRs) encoded by the CT13432 and FKR47N alleles by  
231 amplifying the LRR domain. As expected, IRBB1 and Carolina Gold yielded products of sizes  
232 consistent with the six and five LRRs of *Xa1* and *Xo1*, respectively. CT13432 and FKR47N  
233 produced amplicons of sizes consistent with the presence of seven and five LRRs, respectively  
234 (Fig. 3B). Altogether, these results provide strong evidence that CT13432 and FKR47N  
235 varieties each carry a different allele of the *Xal* *R* gene that is active against African *Xoo* strains  
236 MAI1 and BAI3.

237

### 238 **Suppression of the *Xal*-like resistance in CT13432 unmasks an underlying *Tall* activation** 239 **domain-dependent resistance**

240 We hypothesized that the *Xa1*-like resistance in CT13432 and FKR47N explains the failure of  
241 the *tall* and *talF* knockouts in BAI3 to abolish avirulence of the mutants, respectively, on these  
242 varieties (Fig. 1A). To test this hypothesis directly, we first introduced a plasmid-borne copy  
243 of *tal2h* into BAI3 and inoculated to CT13432 and the susceptible variety Azucena. The  
244 presence of *tal2h* indeed suppressed the *Xa1*-like resistance to BAI3 in CT13432, resulting in  
245 moderate disease symptoms development (Fig. 4A), and higher bacterial titers *in planta* (Fig.  
246 4B) as compared with a BAI3 empty vector control. We next tested whether the combination  
247 of *tal2h*-mediated *Xa1*-like suppression and *tall* inactivation would lead to even higher  
248 virulence on CT13432 by introducing *tal2h* (or the empty vector) into BAI3 $\Delta$ *tall*(*ptal2h*). No  
249 significant differences in lesion lengths or bacterial populations were observed between  
250 BAI3(*ptal2h*) and BAI3 $\Delta$ *tall*(*ptal2h*)(EV). However, expression of *tall*<sub>BAI3</sub> in trans in  
251 BAI3 $\Delta$ *tall*(*ptal2h*) dramatically reduced lesion lengths and bacterial titer *in planta*, relative to  
252 the empty vector in BAI3 $\Delta$ *tall*(*ptal2h*). These results demonstrate that *tall*<sub>BAI3</sub> *avr* activity in  
253 CT13432 can be detected when *Xa1* is inactivated. We next evaluated if restoration of  
254 avirulence could also be obtained upon expression of *tall*<sub>MAII</sub> which is polymorphic at RVDs 4  
255 and 9 (Tran et al. 2018). As with *tall*<sub>BAI3</sub>, expression of *tall*<sub>MAII</sub> lead to reduced lesion lengths  
256 and *in planta* bacterial amounts, indicating that both *tall* variants confer avirulence on  
257 CT13432 (Fig. 4). We next evaluated the requirement of the activation domain (AD) in the  
258 *tall*-specific resistance. BAI3 $\Delta$ *tall*(*ptal2h*) transformed with the deletion derivative construct  
259 *ptall*<sub>MAII</sub> $\Delta$ AD failed to trigger resistance in CT13432 while it remained fully virulent on the  
260 susceptible variety Azucena (Fig. 4A). Western-blot analysis verified that Tall<sub>MAII</sub> and  
261 Tall<sub>MAII</sub> $\Delta$ AD accumulate at comparable levels (Fig. S4). Altogether our results show that the  
262 Tall specifically elicits a form of resistance distinct from the *Xa1*-like resistance in CT13432  
263 and that this elicitation relies on the activation domain of Tall, suggesting the presence of a

264 Tall-activated *E* gene. Further analysis will be necessary to elucidate whether the same is true  
265 for *talF*-mediated resistance in FKR47N.

266

## 267 **Discussion**

268 First identified in Japan in 1884, BLB has been long recognized as a major threat in many  
269 Asian countries, and therefore for decades at the heart of many research and resistance breeding  
270 programs (Liu et al. 2014). To date, a handful of avirulence genes have been cloned from Asian  
271 *Xoo* strains, all of which encode TAL effectors including *avrXa7*, *avrXa10*, *avrXa23*, and  
272 *avrXa27* (Hopkins et al. 1992; Gu et al. 2005; Wang et al. 2014). In contrast, no avirulence  
273 gene has been identified in African *Xoo* strains, the first of which were isolated in the 1980s.  
274 However, as many as nine races of African strains, not found among Asian strains, have been  
275 reported so far (Gonzalez et al. 2007; Tekete et al. 2020), indicating that some effector genes  
276 of African *Xoo* strains act as avirulence factors in gene-for-gene interactions with some rice *R*  
277 genes. Comparison between African and Asian *Xoo* TALomes shows that no *tal* gene is  
278 conserved between these two *Xoo* lineages (Lang et al. 2019). Strains of both lineages induce  
279 the *S* genes *OsSWEET14* and *OsTFXI* through unrelated TALEs, highlighting cases of inter-  
280 lineage evolutionary convergence of virulence functions (Streubel et al. 2013; Tran et al. 2018).  
281 In contrast, none of the rice *E* genes induced by Asian *Xoo* is predicted to be targeted by any  
282 African *Xoo* TALE. Here, toward identifying sources of resistance effective against African  
283 *Xoo* strains, we assessed the putative *avr* activity of 12 previously cloned individual *tal* genes  
284 representing the TALome of two African *Xoo* strains (Tran et al. 2018), using a large set of  
285 rice accessions.

286

287 To accomplish this goal, we first took a gain-of-function approach using the virulent Asian *Xoo*  
288 strain PXO99<sup>A</sup> as a recipient to express cloned African *tal* genes. In a similar approach, we  
289 previously identified major virulence TALEs of African *Xoo* strains using the US strain *Xo*  
290 X11-5A as recipient (Tran et al. 2018). X11-5A lacks *tal* genes and is weakly virulent, allowing  
291 for gain-of-virulence screening (Ryba-White et al. 1995; Triplett et al. 2011). Nonetheless in a  
292 search for gain-of-avirulence, the use of a more virulent strain is required. By selecting the  
293 Asian strain PXO99<sup>A</sup> as recipient, we also minimized the risk of TALE functional redundancy.  
294 This strategy led to the identification of *tall* and *talF* respectively causing resistance in rice  
295 varieties CT13432 and FKR47N, as well as *talD* and *talH*, each triggering resistance on IR64.  
296  
297 In a complementary approach, a loss-of-function analysis was carried out by mutagenizing  
298 individual *tal* genes in the African *Xoo* strain BAI3. This analysis validated *talD* and *tall* as  
299 avirulence genes; a mutant for *talH* was not obtained. Because IR64 has been sequenced and  
300 recombinant populations are available, (Fragoso et al. 2017) prospects for future identification  
301 of the gene(s) underlying the TalD-elicited resistance are good. Mutagenesis of *tall* or *talF*  
302 failed to cause a measurable loss of avirulence in the respective rice varieties CT13432 and  
303 FKR47N. However, *tall* avirulence activity was evident upon trans-expression of the  
304 truncTALE *tal2h* in BAI3 $\Delta$ *tall*, revealing that a resistance like that mediated by Xa1, in  
305 response to TALEs generally and suppressed by truncTALEs, is present in CT13432 and  
306 masking the Tall-specific resistance. By further taking advantage of this combined gain- and  
307 loss-of-function approach, we also determined that the Tall-specific resistance depends on the  
308 activation domain of the effector and thus likely involves an *E* gene.

309

310 While four TALE groups including TalG, TalE, TalD and TalC are strictly conserved between  
311 *Xoo* strains MAI1 and BAI3, two to six RVD variations were reported in the five other groups,  
312 modifying to some extent their DNA binding sequence specificities (Tran et al. 2018). Notably,  
313 three of the four candidate or validated avirulence TALEs identified in this study, TalI, TalF,  
314 and TalH all present RVD polymorphisms across Malian and Burkinabe strains, which could  
315 be the result of some ongoing selection pressure imposed by corresponding *E* or other  
316 resistance genes (Doucouré et al. 2018; Schandry et al. 2018). Surprisingly, the TalD group is  
317 much more conserved, highlighted by an absolute RVD conservation between BAI3, MAI1  
318 and the Cameroonian strain CFBP1947 (Tran et al. 2018), and only one polymorphic RVD  
319 among nine Malian strains investigated (Doucouré et al. 2018). According to the EBE  
320 prediction tools Target Finder and Talvez (Doyle et al. 2012; Pérez-Quintero et al. 2013), 90%  
321 of the first 20 predicted targets of the two versions of TalD are conserved. Such a conservation  
322 among strains hints to an important role in virulence for TalD, but there are no data supporting  
323 this hypothesis so far. Concerning the TalI group, BAI3 and MAI1 alleles differ at two RVDs  
324 and share about 32% of their predicted targets, querying the Nipponbare genome. Since both  
325 variants equally elicit resistance in the rice variety CT13432, their polymorphism may confer  
326 an advantage in future identification of the putative corresponding *E* gene; the gene is likely to  
327 reside among the relatively smaller number of predicted targets in that genome that are shared  
328 by the two alleles.

329

330 Up to now 12 *R* genes against BLB have been cloned, of which 9 are triggered by TALEs  
331 (Jiang et al. 2020; Chen et al. 2021; Luo et al. 2021). This proportion not only highlights the  
332 crucial role of this effector family in the rice-*Xoo* pathosystem but also the relevance of using  
333 TALEs as probes to identify resistance sources and clone the underlying genes. This quest is

334 facilitated by the ability to identify candidate targets of TALEs by combining EBE prediction  
335 and expression analysis, owing to the modular nature of TALE DNA interactions and their  
336 strong transcriptional upregulation of targets (Boch et al. 2014). In a proof-of-concept study  
337 pioneering this strategy for *E* gene identification, Strauss et al (2012) identified the pepper  
338 *Bs4C* gene, which is specifically induced by the TALE AvrBs4 from *X. axonopodis* pv.  
339 *vesicatoria*. More recently, a mix of map-based cloning and EBE predictions led to the isolation  
340 of the *E* gene *Xa7* in rice, which is triggered by the *Xoo* TALE AvrXa7 (Chen et al. 2021; Luo  
341 et al. 2021). In our study, out of the 86 accessions phenotyped, 12 were found to be resistant to  
342 both African *Xoo* strains MAI1 and BAI3, including 7 accessions of *O. sativa*, 2 of *O.*  
343 *glaberrima* and 3 NERICAs. Moreover, 12 *O. glaberrima*, 3 *O. sativa*, 3 *O. barthii* and 2  
344 NERICA accessions were discovered to be resistant specifically to the Malian strain MAI1.  
345  
346 Among the 12 accessions identified as resistant to *Xoo* African strains MAI1 and BAI3, 9  
347 accessions, including CT13432 and FKR47N, showed a phenotype typical of *Xa1* resistance  
348 (Table S2; Fig. S3). This is not surprising since *Xa1* and its functional homologs exhibit broad-  
349 spectrum resistance against African *Xoo* specifically, owing to the lack of iTALEs in examined  
350 African *Xoo* strains (Ji et al. 2016; Read et al.;2016). The *Xa1* allele that we discovered in the  
351 rice variety CT13432 appears to contain seven LRRs, like the allele originally identified as  
352 *Xa45(t)*, which was cloned from the wild rice variety *Oryza nivara-1* (Ji et al. 2020). Other  
353 alleles reported to date contain 4 (*Xa14*), 5 (*Xa2* and *Xo1*), and 6 repeats (*Xa1*). Variety  
354 FKR47N contains an allele that appears to have 6 LRRs. FKR47N, also called NERICA 17, is  
355 the result of crossing *O. glaberrima* variety CG14 and *O. sativa* spp. *japonica* variety  
356 WAB181-18, backcrossing to WAB181-18 as recurrent parent. *Xa1* alleles have been reported  
357 in other NERICAs. Alleles in NERICAs 5 and 7, the recurrent parent of which is the *O. sativa*



358 spp. *japonica* rice variety WAB56-104, have five and six LRRs respectively. NERICAs 12 and  
359 14, coming from the *O. sativa* spp. *japonica* rice variety WAB56-50, each carry an allele with  
360 five LRRs (Ji et al. 2020). According to Ji et al. (2020), a search for *Xa1* allelic members in the  
361 3000 rice genomes revealed that approximately 15% contain the *Xa1* signature sequence. A  
362 phenotypic screening for *Xa1*-like resistance in 87 rice accessions revealed its in 16, including  
363 different rice species such as *O. glaberrima*, *O. nivara* and *O. sativa* (Ji et al. 2020). A  
364 complementary study on more than 500 *O. sativa* accessions revealed that *Xa1* alleles were  
365 present in *aus*, *indica*, temperate and tropical *japonica* (Zhang et al. 2020). The frequency of  
366 *Xa1* alleles among diverse rice varieties and the variability of LRRs number among *Xa1* alleles  
367 observed in these studies and revealed further by our results, underscores the unanswered  
368 question of the origin of the gene and the drivers of its diversification.

369

370 BLB represents a serious threat to rice production in Africa. Varietal resistance is the best  
371 strategy to control BLB durably, but it requires sources of resistance effective against the local  
372 pathogen genotypes. So far, no African strain of *Xoo* with iTALE/truncTALE has been  
373 identified, which makes *Xa1* and its alleles promising tools to control BLB in Africa. Although  
374 the durability of *Xa1* in Africa is difficult to predict, the risk of emergence of strains of *Xoo*  
375 originating from Asia and their spread through the African continent seems high in the current  
376 context of intense global exchanges of rice germplasm and insufficient phytosanitary measures.  
377 Pyramiding of resistance genes against BLB is of great value to extend the durability and the  
378 spectrum of resistance within a rice variety (Oliva et al. 2019). CT13432 combines several rice  
379 blast resistance genes (Pi1, Pi2 and Pi33) (Tharreau et al. 2007; Utami et al. 2011), but here we  
380 found out that it also carries at least two, distinct types of resistance to BLB, an apparent *Xa1*

381 allele and a putative, Tall-dependent *E* gene, making it an excellent material for breeding to  
382 create improved varieties for Africa.

383

## 384 **Conclusions**

385 In this study, we identified 12 rice accessions exhibiting resistance against African strains of  
386 *Xoo* and described 4 TAL effectors from these strains that exhibit avirulence activity. Analysis  
387 of the mechanisms underlying the resistance of the rice variety CT13432 revealed the  
388 occurrence of two overlapping sources of resistance including an apparent allele of the broad-  
389 spectrum resistance gene *Xa1* and an unidentified putative *E* gene that is activated by Tall.  
390 Combining transcriptomics and EBE prediction tools in the genome of CT13432 may allow  
391 discovery of this gene in the future. This approach would also be useful to decipher what genes  
392 in IR64 confer resistance against strains of *Xoo* with TalD.

393

## 394 **Material and Methods**

### 395 **Bacterial Strains and Growth Conditions**

396 Bacterial strains used in this study are listed in Table S4. *Escherichia coli* was cultivated at  
397 37°C in liquid or solid (15 g agar per L) Luria-Bertani (LB) medium (10 g of tryptone, 5 g of  
398 yeast extract, and 5 g of NaCl per L of distilled water), and *Xanthomonas oryzae* pathovars at  
399 28°C in liquid or solid (16 g agar per L) peptone sucrose medium (10 g of peptone, 10 g of  
400 sucrose, and 1 g of glutamic acid per L of distilled water).

401

### 402 **Plant Materials and Plant Inoculations**

403 The rice accessions screened in this study are listed in Table S1. Plants used were grown in a  
404 greenhouse under cycles of 12h of light at 28°C with 80% relative humidity (RH) and 12h of

405 dark at 25°C with 70% RH. When used for bacterial quantification assays, plants were grown  
406 in a growth chamber at 28°C and 80% RH (day and night). For lesion length assays, leaves of  
407 5-week-old plants were inoculated by leaf-clipping with a bacterial suspension at an optical  
408 density at 600 nm (OD<sub>600</sub>) of 0.2. Lesion lengths were measured 15 days post inoculation (dpi)  
409 on at least eight leaves from individual plants per experiment. Leaves of 3-week-old plants  
410 were infiltrated with a needleless syringe and a bacterial suspension at an OD<sub>600</sub> of 0.5.  
411 Symptoms were photographed at 5 dpi. For bacterial quantification assay, 5-week-old plants  
412 were inoculated by leaf-clipping and 10 cm distal leaf fragments of three leaves from three  
413 individual plants per condition were cut in half and ground in liquid nitrogen separately as  
414 reported previously (Yu et al. 2011).

415

#### 416 **Plasmid Transformation**

417 Plasmids were introduced into *E. coli* cells by heat-shock transformation and into *Xoo* by  
418 electroporation or triparental mating (Figurski and Helinski 1979). Appropriate antibiotics for  
419 selection were added to growth media at the following final concentrations: rifampicin, 100  
420 µg.ml<sup>-1</sup>; gentamicin, 100 µg.ml<sup>-1</sup>; tetracycline, 100 µg.ml<sup>-1</sup>; kanamycin, 100 µg.ml<sup>-1</sup>.

421 *tal* genes of the African *Xoo* strains MAI1 and BAI3 are cloned in pSKX1, which confers  
422 gentamicin resistance (Tran et al., 2018; Table S4). The truncTALE *tal2h* is cloned in pKEB31,  
423 which confers tetracycline resistance (Read et al. 2016; Table S4). The plasmids are compatible  
424 with each other.

425

#### 426 **Mutant library construction and characterization**

427 The BAI3 $\Delta$ *tal* mutants were generated upon electroporation of the wild-type strain BAI3 with  
428 the suicide plasmid pSM7 (Cernadas et al. 2014). Mutant strains were selected with kanamycin

429 at 100  $\mu\text{g}\cdot\text{ml}^{-1}$ . The mutant library was characterized by Southern blot analysis. Extraction of  
430 *Xoo* genomic DNA (gDNA) was performed using the Wizard Genomic DNA Purification kit  
431 (Promega<sup>®</sup>). Four micrograms of gDNA were digested by *Bam*HI-HF (New England Biolabs)  
432 at 37°C overnight. The digested DNA was separated in a 1 % agarose gel at 50 Volts for 72  
433 hours at 4°C and transferred to a nylon membrane (Roche<sup>®</sup>) overnight. Hybridization was  
434 conducted according to the procedures described in the DIG High Prime DNA Labeling and  
435 Detection Starter kit II protocol (Roche<sup>®</sup>), using a 725-bp C-terminal *Tal*C<sub>MAII</sub> amplicon as  
436 probe (Yu et al. 2011).

437

#### 438 **Construction of *tall* activation domain mutant**

439 The *tall*<sub>MAII</sub> $\Delta$ AD construct was made by swapping the central repeat region of a *talF*<sub>MAII</sub> $\Delta$ AD  
440 construct with that of *tall*<sub>MAII</sub>. To create the *talF*<sub>MAII</sub> $\Delta$ AD construct, a PCR product  
441 corresponding to a 520 bp fragment encoding the C-terminus of *talF*<sub>MAII</sub> was obtained with  
442 primers  $\Delta$ AD\_Fw and  $\Delta$ AD\_Rv (Table S3), thereby allowing to introduce an inframe 167-nt  
443 deletion. This amplicon was introduced into pSKX1\_*talF*<sub>MAII</sub> between the *Pvu*I and *Hind*III  
444 restriction sites using T4 DNA ligase (Promega<sup>®</sup>) according to manufacturer's  
445 recommendations, creating pSKX1\_*talF*<sub>MAII</sub> $\Delta$ AD. The *tall*<sub>MAII</sub> central repeat region was then  
446 swapped into pSKX1\_*talF*<sub>MAII</sub> $\Delta$ AD using *Stu*I and *Aat*II (NEB, New England Biolabs) to  
447 generate pSKX1\_*tall*<sub>MAII</sub> $\Delta$ AD. The plasmid was confirmed by Sanger sequencing.

448

#### 449 **Expression Analysis by Western Blotting**

450 *Xoo* strains carrying the different combinations of TALE-encoding plasmid, truncTALE  
451 (*tal2h*) -encoding plasmid, and empty vectors (pSKX1 or pKEB31) were grown in liquid  
452 peptone sucrose medium supplemented with the corresponding antibiotics at 28°C. Cells of 1

453 ml of a bacterial suspension at an OD<sub>600</sub> of 0.4 were harvested. Proteins were extracted with  
454 the BugBuster<sup>®</sup> Master Mix (Novagen), according to manufacturer's recommendations. The  
455 total protein concentration of each sample was calculated by a Bradford assay following the  
456 Bio-Rad Protein Assay protocol (Bio-Rad, USA), and protein concentrations adjusted. TALE  
457 and truncTALE expression was analyzed by sodium dodecyl sulfate polyacrylamide gel  
458 electrophoresis using a 4-15% polyacrylamide gel and immunoblotting using the anti-TALE  
459 polyclonal antibody produced by Read et al. (2016) followed by a horseradish peroxidase  
460 conjugated rabbit secondary antibody (Sigma-Aldrich). Detection was carried out using the  
461 Thermo Scientific<sup>™</sup> Pierce<sup>™</sup> ECL 2 Western Blotting Substrate kit and a Typhoon<sup>™</sup> FLA  
462 9500 (General Electric Healthcare Life Sciences, USA) for imaging.

463

#### 464 **PCR-amplification of putative functional *Xa1* alleles**

465 To identify rice accessions harboring a potentially functional *Xa1* allele and to decipher the  
466 number of 93 aa repetitions, genomic DNA of rice accessions was extracted using an adaptation  
467 of the Murray and Thompson protocol (Murray and Thompson 1980) and was subjected to  
468 PCR using pairs of primers XaL-F1/XaL-R1 and XaL-F2/XaL-R2, respectively (Table S3; Ji  
469 et al. 2020).

470

#### 471 **Author's Contributions**

472 ML, BS, and MH designed the experiments. ML and MH conducted the experiments. ET  
473 participated in plant material growth and propagation. ML, AB, BS, and MH performed data  
474 analysis and wrote the manuscript. All authors read and approved the final manuscript.

475

#### 476 **Funding**

477 This work was supported by the CRP-Rice (CGIAR Research Program) to MH and BS, and  
478 the Plant Genome Research Program of the National Science Foundation (Division of  
479 Integrative Organismal Systems IOS-1444511 to AJB).

480

#### 481 **Availability of Data and Materials**

482 The datasets supporting the conclusions of this article are provided within the article and its  
483 supplementary information files.

484

#### 485 **Declarations**

#### 486 **Ethics Approval and Consent to Participate**

487 Not applicable

488

#### 489 **Consent for Publication**

490 Not applicable

491

#### 492 **Competing interests**

493 The authors declare that no competing interests exist.

494

495 **Figure titles and legends**

496

497 **Fig. S1. Molecular characterization of a library of BAI3 $\Delta$ *tal* mutant strains**

498 Genomic DNA of the wild-type *Xoo* strain BAI3 and derivative BAI3 $\Delta$ *tal* mutants were  
499 digested by *Bam*HI-HF which cuts on either side of the central repeat region of *tal* genes and  
500 revealed by Southern blot using a 725-bp C-terminal *tal*<sub>C<sub>MAII</sub> amplicon as probe (Yu et al.  
501 2011). Individual mutants were obtained for each *tal* gene with the exception of *talH*. One  
502 double *talG/talH* mutant was analyzed in stead. BAI3 $\Delta$ *talB* was obtained previously, also using  
503 the suicide plasmid pSM7 (Tran et al., 2018), and is therefore not included here. *tal* genes are  
504 indicated to the left and DNA sizes to the right. Red arrows indicate the *tal* gene(s) that were  
505 mutated.</sub>

506

507 **Fig. 1 BAI3 $\Delta$ *talD* loses avirulence on IR64 but BAI3 $\Delta$ *talI* and BAI3 $\Delta$ *talF* do not on**  
508 **CT13432 and FKR47N.**

509 (A) Leaves of IR64 and Azucena were challenged with *Xoo* strains BAI3, and BAI3 $\Delta$ *talD*  
510 carrying an empty vector (EV) or a plasmid with *talD* (*ptalD*). To assess significance, the  
511 parametrical test ANOVA ( $\alpha = 0.05$ ) was carried out using the R package. Values labeled with  
512 the same lower-case letter are not significantly different. (B) Leaves of rice varieties CT13432,  
513 and FKR47N were clip-inoculated with the wild-type African *Xoo* strain BAI3 and with mutant  
514 strains BAI3 $\Delta$ *talI* and BAI3 $\Delta$ *talF*, respectively. Azucena was included for all strains as a  
515 susceptible check. Lesion lengths were measured at 15 dpi. Data are the mean of eight  
516 measurements. Error bars represent  $\pm$  SD. Significant differences ( $p < 0.001$ ) were determined  
517 using an unpaired two-sample t-test, bars with « ns » are not statistically different. Experiments  
518 were repeated three time with similar results.

519

520 **Fig. S2. Phenotypic responses upon leaf-infiltration of CT13432 and FKR47N plants with**  
521 **BAI3 $\Delta$ *talI* and BAI3 $\Delta$ *talF* mutants.**

522 Leaves of rice varieties IR64, CT13432, FKR47N and Azucena were infiltrated with the wild  
523 type African *Xoo* strain BAI3 and the mutant derivatives BAI3 $\Delta$ *talD*, BAI3 $\Delta$ *tall* and  
524 BAI3 $\Delta$ *talF*. Inoculated leaves were photographed at 5 dpi.

525

526 **Fig. 2 The resistance of CT13432 and FKR47N against African *Xoo* is largely suppressed**  
527 **by a truncTALE.**

528 Leaves of CT13432 and FKR47N rice varieties were inoculated with *Xoo* strains BAI3 and  
529 MAI1 carrying an empty vector (EV) or the truncTALE *tal2h* as well as *Xanthomonas oryzae*  
530 pv. *oryzicola* (*Xoc*) strain BLS256 which is naturally carrying *tal2h* and the mutant strain  
531 BLS256 $\Delta$ *tal2h*. The susceptible rice variety Azucena and the Asian *Xoo* strain PXO99<sup>A</sup> were  
532 used as controls. Leaves were photographed at 5 dpi.

533

534 **Fig. S3. The *tal2h* truncTALE reveals *Xa1*-like resistance against the *Xoo* strain BAI3 in**  
535 **several rice varieties.**

536 Leaves of rice accessions, including Carolina Gold Select which carries *Xo1*, and IRBB1 which  
537 carries *Xa1*, were infiltrated with *Xoc* strain BLS256 which naturally carries the *tal2h*  
538 truncTALE gene, the mutant strain BLS256 $\Delta$ *tal2h*, as well as with *Xoo* strain BAI3 carrying  
539 an empty vector (EV) or *tal2h*. The Asian *Xoo* strain PXO99<sup>A</sup> which harbors two truncTALEs,  
540 was used as an additional positive control. Leaves were photographed at 5 dpi.

541

542 **Fig. 3 The rice varieties CT13432 and FKR47N carry distinct apparent alleles of *Xa1*.**

543 The genomic DNA of rice varieties Carolina Gold Select, CT13432, FKR47N, Nipponbare,  
544 Azucena, IRBB1 and IR24 were used as a template for PCR amplification of (A) the junction  
545 of the first repeat of 279 base pairs of *Xa1* and its upstream region, (B) the whole repeat region  
546 of *Xa1* and alleles, and (C) the housekeeping gene *OsSUT1* used as a control. All the samples  
547 were run on the same gel.

548



549 **Fig. 4 Suppression of Xa1-like resistance unmasks *talI* avirulence activity in the rice**  
550 **variety CT13432.**

551 (A) Leaves of CT13432 and Azucena plants were clip-inoculated with the *Xoo* strain BAI3  
552 carrying the pKEB31 empty vector (EV), the BAI3 $\Delta$ *talI* mutant carrying the pKEB31 empty  
553 vector (EV), the BAI3 strain expressing the *tal2h* truncTALE, and BAI3 $\Delta$ *talI* expressing *tal2h*  
554 and the pSKX1 empty vector (EV), or pSKX1 containing *talI*<sub>BAI3</sub>, *talI*<sub>MAII</sub> or *talI*<sub>MAII</sub> $\Delta$ AD.  
555 Lesion lengths were measured at 15 dpi. Data are the mean of eight measurements. (B)  
556 Bacterial counts were taken 7 days post-inoculation of rice leaves of CT13432 and Azucena  
557 inoculated with the same panel of *Xoo* strains used in (A). Statistical tests in both experiments  
558 were carried out in R using the nonparametric Kruskal-Wallis and Dunn's tests ( $\alpha = 0.05$ ).  
559 Values labeled with the same lower-case letter are not significantly different.

560

561 **Fig. S4. Western-blot analysis of *Xoo* total protein extracts using an anti-TALE antibody.**

562 Proteins extracts prepared from *Xoo* strain BAI3 carrying the empty vector pKEB31 (EV),  
563 BAI3 $\Delta$ *talI* carrying the empty vector pKEB31 (EV), BAI3 carrying the *tal2h* truncTALE gene,  
564 and BAI3 $\Delta$ *talI* with *tal2h* and the pSKX1 empty vector (EV), or pSKX1 containing *talI*<sub>BAI3</sub> or  
565 *talI*<sub>MAII</sub> or *talI*<sub>MAII</sub> $\Delta$ AD. BAI3 *tal* genes and *tal2h* are indicated to the left and right,  
566 respectively. Molecular weight is indicated.

567

568

569 **References**

- 570 Ainsworth EA (2008) Rice production in a changing climate: A meta-analysis of responses to  
571 elevated carbon dioxide and elevated ozone concentration. *Glob Chang Biol* 14:1642–  
572 1650. <https://doi.org/10.1111/j.1365-2486.2008.01594.x>
- 573 Boch J, Bonas U, Lahaye T (2014) TAL effectors - pathogen strategies and plant resistance  
574 engineering. *New Phytol* 204:823–832. <https://doi.org/10.1111/nph.13015>
- 575 Boch J, Scholze H, Schornack S, et al (2009) Breaking the code of DNA binding specificity  
576 of TAL-type III effectors. *Science* (80- ) 326:1509–1512.  
577 <https://doi.org/10.1126/science.1178811>
- 578 Cernadas RA, Doyle EL, Niño-Liu DO, et al (2014) Code-Assisted Discovery of TAL  
579 Effector Targets in Bacterial Leaf Streak of Rice Reveals Contrast with Bacterial Blight  
580 and a Novel Susceptibility Gene. *PLoS Pathog* 10:.  
581 <https://doi.org/10.1371/journal.ppat.1003972>
- 582 Chen X, Liu P, Mei L, et al (2021) Xa7, a new executor R gene that confers durable and  
583 broad-spectrum resistance to bacterial blight disease in rice. *Plant Commun* 2:100143.  
584 <https://doi.org/10.1016/j.xplc.2021.100143>
- 585 Chu Z, Fu B, Yang H, et al (2006) Targeting xa13, a recessive gene for bacterial blight  
586 resistance in rice. *Theor Appl Genet* 112:455–461. [https://doi.org/10.1007/s00122-005-  
587 0145-6](https://doi.org/10.1007/s00122-005-0145-6)
- 588 Djedatin G, Ndjiondjop MN, Mathieu T, et al (2011) Evaluation of African cultivated rice  
589 *Oryza glaberrima* for resistance to bacterial blight. *Plant Dis* 95:441–447.  
590 <https://doi.org/10.1094/PDIS-08-10-0558>

- 591 Doucouré H, Pérez-Quintero AL, Reshetnyak G, et al (2018) Functional and genome  
592 sequence-driven characterization of tal effector gene repertoires reveals novel variants  
593 with altered specificities in closely related malian *Xanthomonas oryzae* pv. *oryzae*  
594 strains. *Front Microbiol* 9:1–17. <https://doi.org/10.3389/fmicb.2018.01657>
- 595 Doyle EL, Booher NJ, Standage DS, et al (2012) TAL Effector-Nucleotide Targeter (TALE-  
596 NT) 2.0: Tools for TAL effector design and target prediction. *Nucleic Acids Res*  
597 40:W117–W122. <https://doi.org/10.1093/nar/gks608>
- 598 Figurski DH, Helinski DR (1979) Replication of an origin-containing derivative of plasmid  
599 RK2 dependent on a plasmid function provided in trans. *Proc Natl Acad Sci* 76:1648–  
600 1652. <https://doi.org/10.1073/PNAS.76.4.1648>
- 601 Fragoso CA, Moreno M, Wang Z, et al (2017) Genetic Architecture of a Rice Nested  
602 Association Mapping Population. *G3 Genes|Genomes|Genetics* 7:1913–1926.  
603 <https://doi.org/10.1534/G3.117.041608>
- 604 Garcia-Ruiz H, Szurek B, Van den Ackerveken G (2021) Stop helping pathogens:  
605 engineering plant susceptibility genes for durable resistance. *Curr Opin Biotechnol*  
606 70:187–195. <https://doi.org/10.1016/j.copbio.2021.05.005>
- 607 Gonzalez C, Szurek B, Manceau C, et al (2007) Molecular and pathotypic characterization of  
608 new *Xanthomonas oryzae* strains from West Africa. *Mol Plant-Microbe Interact* 20:534–  
609 546. <https://doi.org/10.1094/MPMI-20-5-0534>
- 610 Gu K, Yang B, Tian D, et al (2005) R gene expression induced by a type-III effector triggers  
611 disease resistance in rice. *Nature* 435:1122–1125. <https://doi.org/10.1038/nature03630>
- 612 Hopkins C, White F, Choi S, et al (1992) Hopkins 1992.pdf. *Mol Plant Microbe Interact*  
613 5:451–459. <https://doi.org/10.1094/MPMI-5-451>

- 614 Hu K, Cao J, Zhang J, et al (2017) Improvement of multiple agronomic traits by a disease  
615 resistance gene via cell wall reinforcement. *Nat Plants* 3:.  
616 <https://doi.org/10.1038/nplants.2017.9>
- 617 Hutin M, Sabot F, Ghesquière A, et al (2015) A knowledge-based molecular screen uncovers  
618 a broad-spectrum OsSWEET14 resistance allele to bacterial blight from wild rice. *Plant*  
619 *J* 84:694–703. <https://doi.org/10.1111/tpj.13042>
- 620 Ji C, Ji Z, Liu B, et al (2020) Xa1 Allelic R Genes Activate Rice Blight Resistance  
621 Suppressed by Interfering TAL Effectors. *Plant Commun* 1:100087.  
622 <https://doi.org/10.1016/j.xplc.2020.100087>
- 623 Ji Z, Ji C, Liu B, et al (2016) Interfering TAL effectors of *Xanthomonas oryzae* neutralize R-  
624 gene-mediated plant disease resistance. *Nat Commun* 7:1–9.  
625 <https://doi.org/10.1038/ncomms13435>
- 626 Jiang N, Yan J, Liang Y, et al (2020) Resistance Genes and their Interactions with Bacterial  
627 Blight/Leaf Streak Pathogens (*Xanthomonas oryzae*) in Rice (*Oryza sativa* L.)—an  
628 Updated Review. *Rice* 13:.. <https://doi.org/10.1186/s12284-019-0358-y>
- 629 Lang JM, Pérez-Quintero AL, Koebnik R, et al (2019) A pathovar of *Xanthomonas oryzae*  
630 infecting wild grasses provides insight into the evolution of pathogenicity in rice  
631 agroecosystems. *Front Plant Sci* 10:507. <https://doi.org/10.3389/fpls.2019.00507>
- 632 Liu Q, Yuan M, Zhou Y, et al (2011) A paralog of the MtN3/saliva family recessively  
633 confers race-specific resistance to *Xanthomonas oryzae* in rice. *Plant Cell Environ*  
634 34:1958–1969. <https://doi.org/10.1111/J.1365-3040.2011.02391.X>
- 635 Liu W, Liu J, Triplett L, et al (2014) Novel insights into rice innate immunity against  
636 bacterial and fungal pathogens. *Annu Rev Phytopathol* 52:213–241.  
637 <https://doi.org/10.1146/annurev-phyto-102313-045926>

- 638 Luo D, Huguet-Tapia JC, Raborn RT, et al (2021) The Xa7 resistance gene guards the rice  
639 susceptibility gene SWEET14 against exploitation by the bacterial blight pathogen.  
640 Plant Commun 2:100164. <https://doi.org/10.1016/j.xplc.2021.100164>
- 641 Moscou MJ, Bogdanove AJ (2009) A simple cipher governs DNA recognition by TAL  
642 effectors. Science (80- ) 326:1501. <https://doi.org/10.1126/science.1178817>
- 643 Murray MG, Thompson WF (1980) Rapid isolation of high molecular weight plant DNA.  
644 Nucleic Acids Res 8:4321–4326. <https://doi.org/10.1093/NAR/8.19.4321>
- 645 Niño-Liu DO, Ronald PC, Bogdanove AJ (2006) *Xanthomonas oryzae* pathovars: Model  
646 pathogens of a model crop. Mol Plant Pathol 7:303–324. [https://doi.org/10.1111/j.1364-](https://doi.org/10.1111/j.1364-3703.2006.00344.x)  
647 [3703.2006.00344.x](https://doi.org/10.1111/j.1364-3703.2006.00344.x)
- 648 Oliva R, Ji C, Atienza-Grande G, et al (2019) Broad-spectrum resistance to bacterial blight in  
649 rice using genome editing. Nat Biotechnol 37:1344–1350.  
650 <https://doi.org/10.1038/s41587-019-0267-z>
- 651 Pérez-Quintero AL, Rodríguez-R LM, Dereeper A, et al (2013) An Improved Method for  
652 TAL Effectors DNA-Binding Sites Prediction Reveals Functional Convergence in TAL  
653 Repertoires of *Xanthomonas oryzae* Strains. PLoS One 8:.  
654 <https://doi.org/10.1371/journal.pone.0068464>
- 655 Poulin L, Grygiel P, Magne M, et al (2015) New multilocus variable-number tandem-repeat  
656 analysis tool for surveillance and local epidemiology of bacterial leaf blight and  
657 bacterial leaf streak of rice caused by *Xanthomonas oryzae*. Appl Environ Microbiol  
658 81:688–698. <https://doi.org/10.1128/AEM.02768-14>
- 659 Read AC, Hutin M, Moscou MJ, et al (2020) Cloning of the rice Xo1 resistance gene and  
660 interaction of the Xo1 protein with the defense-suppressing *Xanthomonas* effector

- 661 Tal2h. *Mol Plant-Microbe Interact* 33:1189–1195. <https://doi.org/10.1094/MPMI-05-20->  
662 0131-SC
- 663 Read AC, Rinaldi FC, Hutin M, et al (2016) Suppression of Xo1-mediated disease resistance  
664 in rice by a truncated, non-DNA-binding TAL effector of *Xanthomonas oryzae*. *Front*  
665 *Plant Sci* 7:1–14. <https://doi.org/10.3389/fpls.2016.01516>
- 666 Ryba-White M, Nottoghem JL, Leach J. (1995) Comparison of *Xanthomonas oryzae* pv.  
667 *oryzae* strains from Africa, North America, and Asia by restriction fragment length  
668 polymorphism analysis. <https://agris.fao.org/agris->  
669 [search/search.do?recordID=QR9500053](https://agris.fao.org/agris-search/search.do?recordID=QR9500053). Accessed 14 Aug 2021
- 670 Savary S, Willocquet L, Pethybridge SJ, et al (2019) The global burden of pathogens and  
671 pests on major food crops. *Nat Ecol Evol* 3:430–439. <https://doi.org/10.1038/s41559->  
672 018-0793-y
- 673 Schandry N, Jacobs JM, Szurek B, Perez-Quintero AL (2018) A cautionary TALE: how plant  
674 breeding may have favoured expanded TALE repertoires in *Xanthomonas*. *Mol Plant*  
675 *Pathol* 19:1297. <https://doi.org/10.1111/MPP.12670>
- 676 Song W-YY, Wang G-LL, Chen L-LL, et al (1995) A receptor kinase-like protein encoded  
677 by the rice disease resistance gene, Xa21. *Science* (80- ) 270:1804.  
678 <https://doi.org/10.1126/science.270.5243.1804>
- 679 Strauß T, Van Poecke RMP, Strauß A, et al (2012) RNA-seq pinpoints a *Xanthomonas* TAL-  
680 effector activated resistance gene in a large-crop genome. *Proc Natl Acad Sci U S A*  
681 109:19480–19485. <https://doi.org/10.1073/pnas.1212415109>
- 682 Streubel J, Pesce C, Hutin M, et al (2013) Five phylogenetically close rice SWEET genes  
683 confer TAL effector-mediated susceptibility to *Xanthomonas oryzae* pv. *oryzae*. *New*  
684 *Phytol* 200:808–819. <https://doi.org/10.1111/nph.12411>

- 685 Sun X, Cao Y, Yang Z, et al (2004) Xa26, a gene conferring resistance to *Xanthomonas*  
686 *oryzae* pv. *oryzae* in rice, encodes an LRR receptor kinase-like protein. *Plant J* 37:517–  
687 527. <https://doi.org/10.1046/j.1365-313X.2003.01976.x>
- 688 Tekete C, Cunnac S, Doucouré H, et al (2020) Characterization of New Races of  
689 *Xanthomonas oryzae* pv. *oryzae* in Mali Informs Resistance Gene Deployment.  
690 *Phytopathology* 110:267–277. <https://doi.org/10.1094/PHYTO-02-19-0070-R>
- 691 Tharreau D, Notteghem JL, Morel JB, et al (2007) Developing Blast Durable Resistance By  
692 Using The Wild Rice Species, *Oryza rufipogon* : Presentasi RUTI IV
- 693 Tian D, Wang J, Zeng X, et al (2014) The Rice TAL effector-dependent resistance protein  
694 XA10 triggers cell death and calcium depletion in the endoplasmic reticulum. *Plant Cell*  
695 26:497–515. <https://doi.org/10.1105/tpc.113.119255>
- 696 Tran TT, Pérez-Quintero AL, Wonni I, et al (2018) Functional analysis of African  
697 *Xanthomonas oryzae* pv. *oryzae* TALomes reveals a new susceptibility gene in bacterial  
698 leaf blight of rice. *PLoS Pathog* 14:1–25. <https://doi.org/10.1371/journal.ppat.1007092>
- 699 Triplett LR, Cohen SP, Heffelfinger C, et al (2016) A resistance locus in the American  
700 heirloom rice variety Carolina Gold Select is triggered by TAL effectors with diverse  
701 predicted targets and is effective against African strains of *Xanthomonas oryzae* pv.  
702 *oryzicola*. *Plant J* 87:472–483. <https://doi.org/10.1111/tpj.13212>
- 703 Triplett LR, Hamilton JP, Buell CR, et al (2011) Genomic analysis of *Xanthomonas oryzae*  
704 isolates from rice grown in the united states reveals substantial divergence from known  
705 *X. oryzae* pathovars. *Appl Environ Microbiol* 77:3930–3937.  
706 <https://doi.org/10.1128/AEM.00028-11>

- 707 UTAMI DW, Barnita K, Yuriah S, Hanarida I (2011) Nucleotide Base Variation of Blast  
708 Disease Resistance Gene Pi33 in Rice Selected Broad Genetic Background. HAYATI J  
709 Biosci 18:123–128. <https://doi.org/10.4308/hjb.18.3.123>
- 710 Wang C, Qin TF, Yu HM, et al (2014) The broad bacterial blight resistance of rice line  
711 CBB23 is triggered by a novel transcription activator-like (TAL) effector of  
712 *Xanthomonas oryzae* pv. *oryzae*. Mol Plant Pathol 15:333–341.  
713 <https://doi.org/10.1111/mpp.12092>
- 714 Wang C, Zhang X, Fan Y, et al (2015) XA23 Is an executor r protein and confers broad-  
715 spectrum disease resistance in rice. Mol Plant 8:290–302.  
716 <https://doi.org/10.1016/j.molp.2014.10.010>
- 717 Wonni I, Hutin M, Ouédraogo L, et al (2016) Evaluation of Elite Rice Varieties Unmasks New  
718 Sources of Bacterial Blight and Leaf Streak Resistance for Africa. Rice Res Open  
719 Access 4:1–8. <https://doi.org/10.4172/2375-4338.1000162>
- 720 Xiang Y, Cao Y, Xu C, et al (2006) Xa3, conferring resistance for rice bacterial blight and  
721 encoding a receptor kinase-like protein, is the same as Xa26. Theor Appl Genet  
722 113:1347–1355. <https://doi.org/10.1007/s00122-006-0388-x>
- 723 Yu Y, Streubel J, Balzergue S, et al (2011) Colonization of rice leaf blades by an African  
724 strain of *Xanthomonas oryzae* pv. *oryzae* depends on a new TAL effector that induces  
725 the rice nodulin-3 Os11N3 gene. Mol Plant-Microbe Interact 24:1102–1113.  
726 <https://doi.org/10.1094/MPMI-11-10-0254>
- 727 Zhang B, Zhang H, Li F, et al (2020) Multiple Alleles Encoding Atypical NLRs with Unique  
728 Central Tandem Repeats in Rice Confer Resistance to *Xanthomonas oryzae* pv. *oryzae*.  
729 Plant Commun 1:100088. <https://doi.org/10.1016/j.xplc.2020.100088>



730 Zhang J, Yin Z, White F (2015) TAL effectors and the executor R genes. *Front Plant Sci* 6:1–

731 9. <https://doi.org/10.3389/fpls.2015.00641>

732

733

A

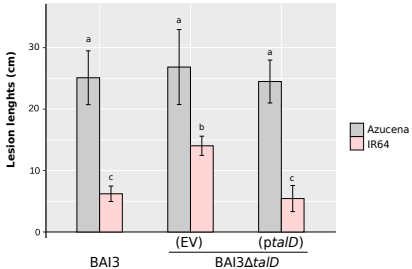

B

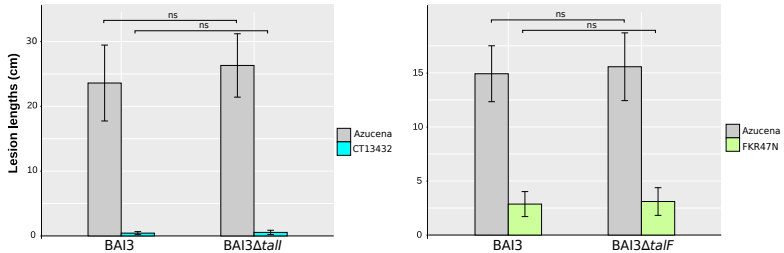

| Name      | Species                                                      | MAI1 <sup>o</sup> | BAI3 <sup>o</sup> | PXO99 <sup>Ao</sup> | *Candidate avirulence TALEs |
|-----------|--------------------------------------------------------------|-------------------|-------------------|---------------------|-----------------------------|
| Og_107    | <i>O. glaberrima</i>                                         | R                 | MR                | S                   | -                           |
| Og_162    | <i>O. glaberrima</i>                                         | R                 | MR                | S                   | -                           |
| WAB56-50  | <i>O. sativa</i> spp. <i>japonica</i>                        | R                 | R                 | S                   | -                           |
| WAB181-18 | <i>O. sativa</i> spp. <i>japonica</i>                        | R                 | R                 | S                   | -                           |
| FKR19     | <i>O. sativa</i> spp. <i>japonica</i>                        | R                 | R                 | S                   | -                           |
| FKR43     | <i>O. sativa</i> spp. <i>japonica</i>                        | R                 | R                 | S                   | -                           |
| IR64      | <i>O. sativa</i> spp. <i>indica</i>                          | R                 | MR                | S                   | TalD, TalH                  |
| CT13432   | <i>O. sativa</i> spp. <i>japonica</i>                        | R                 | R                 | S                   | TalI                        |
| Gigante   | <i>O. sativa</i>                                             | R                 | R                 | S                   | -                           |
| FKR45N    | <i>O. sativa</i> spp. <i>japonica</i> / <i>O. glaberrima</i> | R                 | R                 | S                   | -                           |
| FKR47N    | <i>O. sativa</i> spp. <i>japonica</i> / <i>O. glaberrima</i> | R                 | R                 | S                   | TalF                        |
| FKR49N    | <i>O. sativa</i> spp. <i>japonica</i> / <i>O. glaberrima</i> | R                 | R                 | S                   | -                           |

**Table 1** Four African TALEs mediate resistance when expressed in PXO99<sup>A</sup> on resistant varieties.

<sup>o</sup>Resistance or susceptibility of rice to *Xoo* is expressed as a result of lesion length measurements 15 days after inoculation. Resistant (R); moderately resistant (MR); moderately susceptible (MS); susceptible (S).

<sup>A</sup>Rice accessions were inoculated with PXO99<sup>A</sup> carrying each of the nine *tales* of MAI1. (-) means no candidate avirulence TALE identified.

*Xanthomonas oryzae*  
pv. *oryzae*

*Xanthomonas oryzae*  
pv. *oryzicola*

BAI3(EV)

BAI3(*pta12h*)

MAI1(EV)

MAI1(*pta12h*)

PXO99<sup>A</sup>

Mock

BLS256

BLS256 $\Delta$ *pta12h*

Azucena

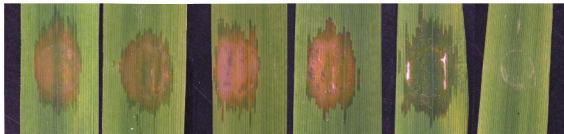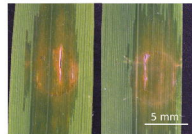

CT13432

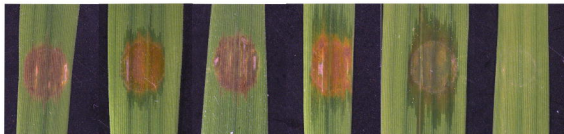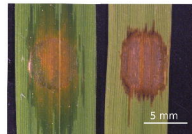

FKR47N

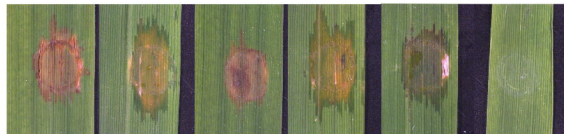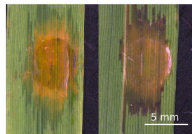

*Carolina Gold Select*  
CT13432  
FKR47N  
Nipponbare  
Azucena  
IRBB1  
IR24

A

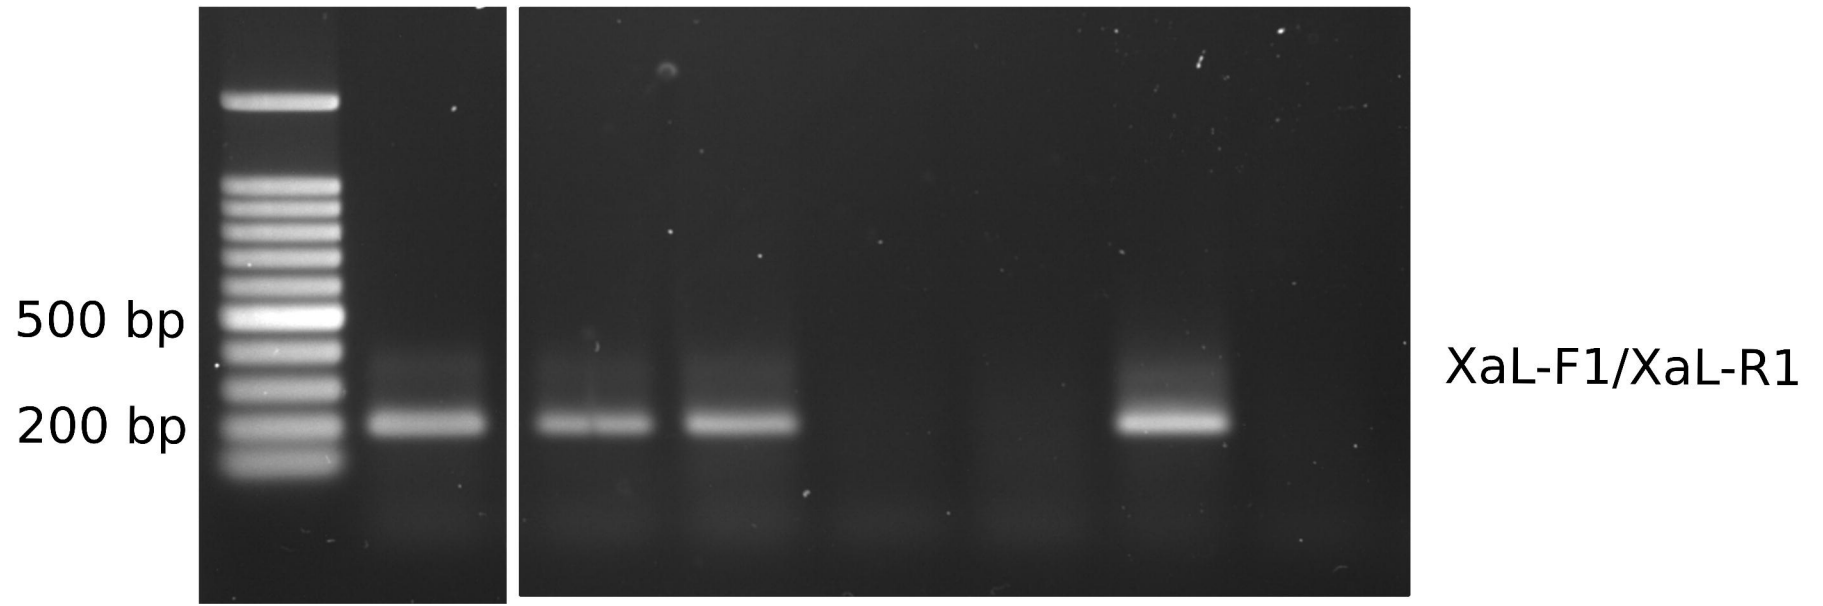

B

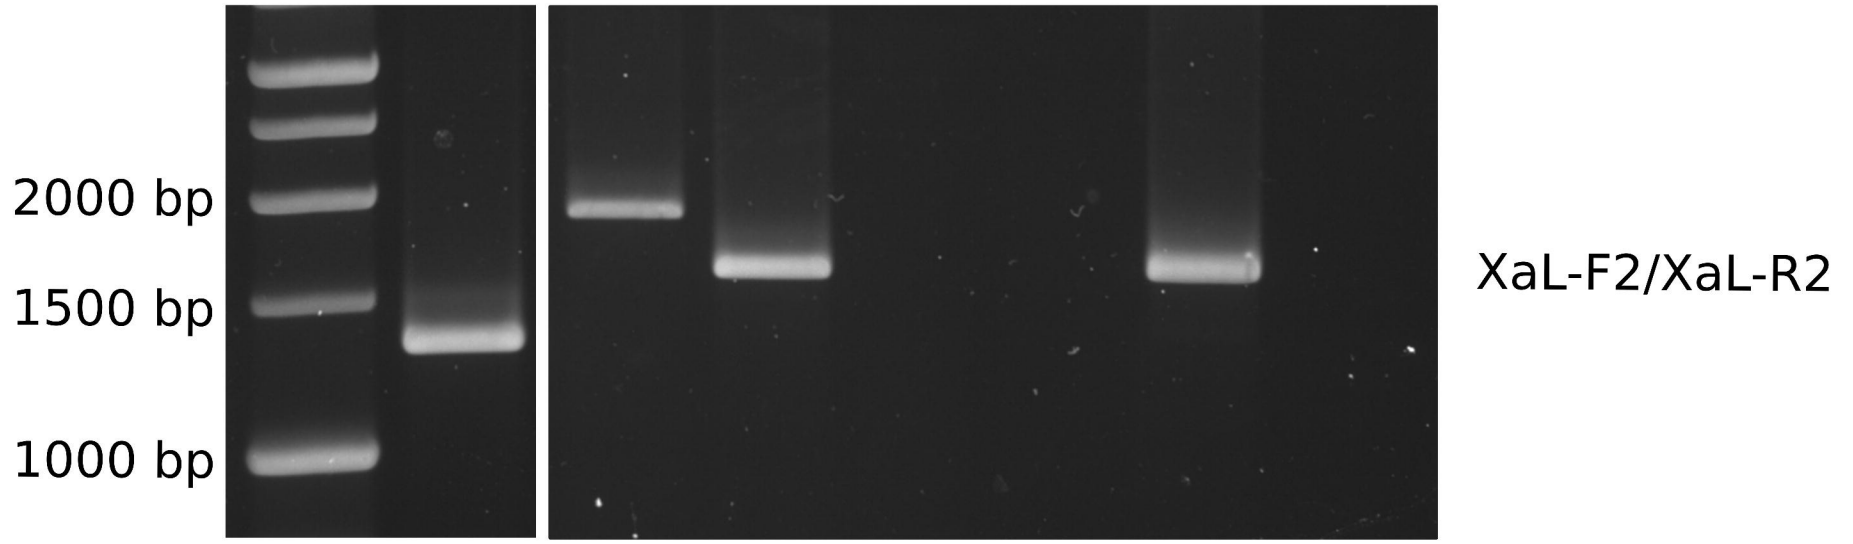

C

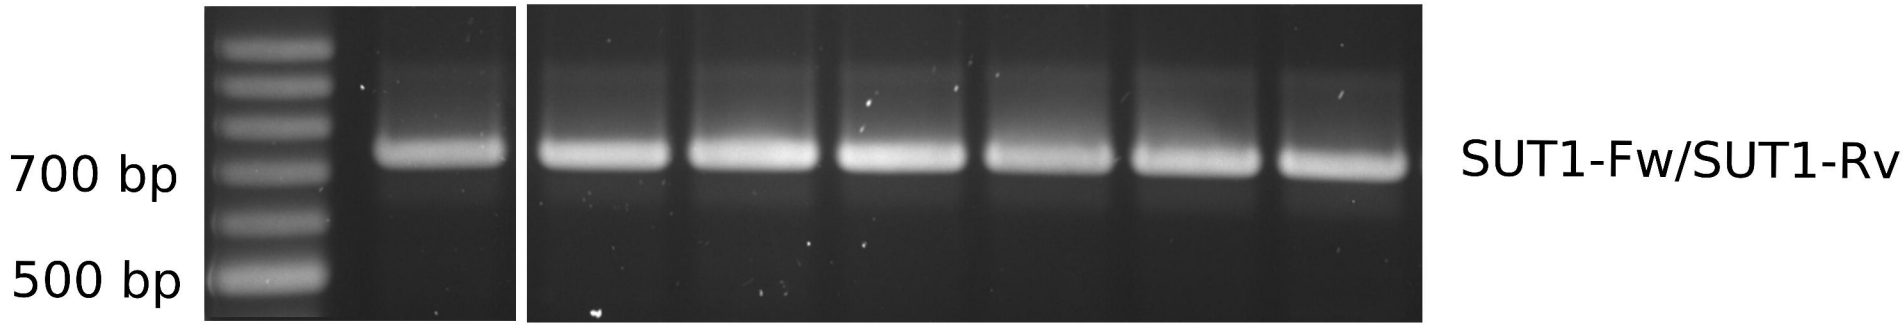

A

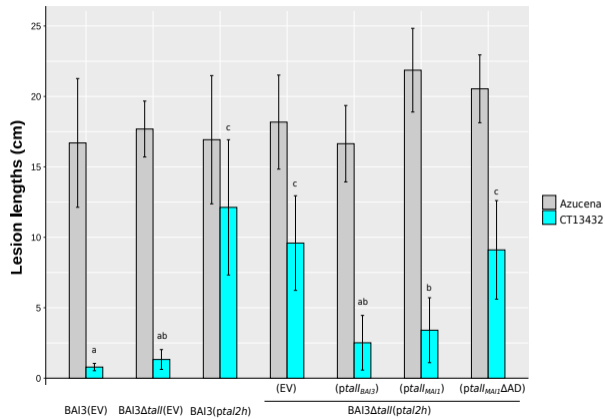

B

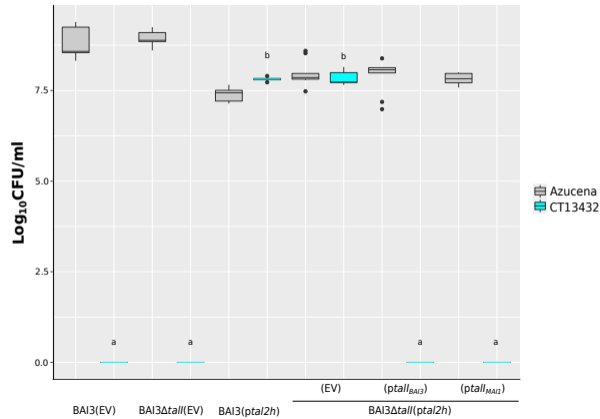

Source: http://biorxiv.org/content/10.1101/2021.10.21.465293v1.full.pdf
